# Supplementary material for: The landscape of NUP98 rearrangements clinical characteristics and treatment response from 1491 acute leukemia patients
Source: PubMed Central journal article supplement (PMC11094082; doi:10.1038/s41408-024-01066-y), 2024-05-14
Supplement: 41408_2024_1066_MOESM1_ESM.pdf [file 41408_2024_1066_MOESM1_ESM.pdf]

**Table S1. Detail information of the 55 NUP98-rearranged patients including 51 AML and 4 ALL.**

| Case ID | Gender | Age, year | White blood cells (×10 <sup>9</sup> /L) | Hemoglobin (g/L) | Platelets (×10 <sup>9</sup> /L) | Blast cell in bone marrow (%) | FAB type | NUP98 partner | Karyotype                                          | Other co-mutations                                                                                                                                                                                   | induction therapy | Disease status after induction therapy | Salvage Therapy | Optimal disease state | If received HSCT | Survival (day) |
|---------|--------|-----------|-----------------------------------------|------------------|---------------------------------|-------------------------------|----------|---------------|----------------------------------------------------|------------------------------------------------------------------------------------------------------------------------------------------------------------------------------------------------------|-------------------|----------------------------------------|-----------------|-----------------------|------------------|----------------|
| 1       | F      | 22        | 139.48                                  | 73               | 57                              | 67                            | M5       | NSD1          | 46,XX                                              | FLT3-ITD p.L610_E611insVNEYFYVDFREYEYDLKWEFPREN (VAF 3.7%), MYC p.P75L (VAF 42.1%), PTPN11 p.D61Y (VAF 41.2%)                                                                                        | IC                | NR                                     | /               | NR                    | No               | No (411)       |
| 2       | F      | 19        | 369                                     | 94               | 79                              | 76                            | M4       | NSD1          | 36-45,XX,-7,-8,-15,-18,-20,-21,-22[cp12]/46,XX     | FLT3-ITD p.N609_L610insWGEYDLKWEFPREN (VAF 27.3%)                                                                                                                                                    | IC                | NR                                     | LIT+FLT3i       | CR                    | Yes              | Yes (1320)     |
| 3       | F      | 35        | 103.67                                  | 82               | 81                              | 89.5                          | M4       | NSD1          | 46,XX                                              | FLT3-ITD p.N609_L610insVDFREYEYDLKWEFPREN (VAF 17.6%), WT1 p.R375Gfs*6 (VAF 46.7%), BCOR p.L984Q (VAF 45.7%)                                                                                         | IC                | NR                                     | LIT             | CR                    | No               | NA             |
| 4       | F      | 40        | 58.26                                   | 92               | 96                              | 72.5                          | M2       | NSD1          | 46,XX                                              | FLT3-ITD p.D600_L601insFREYEYD (VAF 27%), MYC p.P74dup (VAF 30.2%), WT1 p.V384Lfs*72 (VAF 9.3%)                                                                                                      | IC                | NR                                     | LIT+FLT3i       | CR                    | Yes              | Yes (982)      |
| 5       | M      | 42        | 25.97                                   | 80               | 79                              | 78.5                          | M4       | NSD1          | 46,XY,inv(9)c                                      | FLT3-ITD p.E598_Y599insSNVDFREYE (VAF 6.8%), FLT3-ITD p.E608_N609insYEYDLKWEFPRE (VAF 16.4%)                                                                                                         | IC                | NR                                     | IC+FLT3i        | CR                    | Yes              | Yes (931)      |
| 6       | M      | 26        | 76.92                                   | 95               | 35                              | 83                            | M4       | NSD1          | 32-45,XY,-6,-7,-15,-17,-18,-20,-21,-22[cp16]/46,XY | FLT3-ITD p.F612_G613insDNEYFYVDFREYEYDLKWEFPRENLEF (VAF 24.4%), WT1 p.A387Gfs*69 (VAF 47.4%)                                                                                                         | IC                | PR                                     | LIT+Ven         | CR                    | Yes              | Yes (931)      |
| 7       | F      | 66        | 11.42                                   | 60               | 35                              | 68.5                          | t-AML    | NSD1          | 46,XX                                              | FLT3-ITD p.F612_G613insGLVDFREYEYDLKWEFPRENLEF (VAF 15.7%), DNMT3A p.H694P (VAF 43%), WT1 p.R385Gfs*5 (VAF 31.8%), ZBTB7A p.G582Qfs*64 (VAF 38.7%)                                                   | LIT+Ven           | NR                                     | LIT+Ven+FLT3i   | CR                    | No               | Yes (915)      |
| 8       | F      | 65        | 168                                     | 66               | 65                              | 46                            | AML      | NSD1          | 46,XX                                              | FLT3-ITD p.R595_E596insDGSSDNEYFYVDFR (VAF 33.9%)                                                                                                                                                    | IC                | NR                                     | LIT+FLT3i       | CR                    | No               | No (565)       |
| 9       | M      | 52        | 113.7                                   | 127              | 102                             | 74                            | M5       | NSD1          | 46,XY                                              | FLT3-ITD p.D600_L601insFREYEYD (VAF 41.3%)                                                                                                                                                           | IC                | NR                                     | LIT+Ven+FLT3i   | CR                    | Yes              | Yes (814)      |
| 10      | M      | 39        | 82.19                                   | 75               | 47                              | 74.5                          | M5       | NSD1          | 46,XY                                              | FLT3-ITD p.E598_Y599insTGSSDNEYFYVDFREYE (VAF 13.7%), CEBPA p.A111Gfs*56 (VAF 21.3%), WT1 p.S386* (VAF 7.6%)                                                                                         | IC                | NR                                     | /               | NR                    | No               | NA             |
| 11      | F      | 61        | 4.66                                    | 70               | 62                              | 29                            | M2       | NSD1          | 46,XX                                              | TET2 c.3594+1G>C (VAF 37.4%), SMC1A p.R586Q (VAF 42.3%)                                                                                                                                              | LIT+Ven           | CR                                     | /               | CR                    | Yes              | Yes (721)      |
| 12      | F      | 55        | 3.95                                    | 98               | 41                              | 86.5                          | M4       | NSD1          | 46,XX                                              | FLT3-ITD p.F594_D600dup (VAF 47.2%), RUNX1 p.R166P (VAF 42.9%)                                                                                                                                       | IC                | PR                                     | LIT+Ven+FLT3i   | CR                    | Yes              | Yes (709)      |
| 13      | M      | 41        | 2.25                                    | 84               | 54                              | 66.5                          | M4       | NSD1          | 47,XY,+8/46,XY                                     | WT1 p.S386* (VAF 7.4%)                                                                                                                                                                               | IC                | PR                                     | LIT+Ven+FLT3i   | CR                    | Yes              | Yes (632)      |
| 14      | M      | 26        | 142.5                                   | 107              | 48                              | 63.5                          | M4       | NSD1          | 46,XY                                              | FLT3-ITD p.D593_F605dup (VAF 33.2%)                                                                                                                                                                  | IC+FLT3i          | PR                                     | LIT+Ven+FLT3i   | CR                    | Yes              | Yes (543)      |
| 15      | F      | 79        | 32.9                                    | 78               | 92                              | 95                            | M4       | NSD1          | 46,XX                                              | FLT3-ITD p.N609_L610insPSMSTSRCREYEYDLKWEFPREN (VAF 35.3%), ASXL1 p.R404* (VAF 44.9%), TET2 p.Q943* (VAF 50.1%), WT1 p.T382Afs*2 (VAF 7.3%), WT1 p.L316Ffs*33 (VAF 54.5%), RUNX1 p.W477L (VAF 10.6%) | LIT+Ven           | CR                                     | /               | CR                    | No               | No (285)       |
| 16      | M      | 28        | 152.1                                   | 127              | 61                              | 81.5                          | M5       | NSD1          | 46,XY                                              | FLT3-ITD p.Y597_E608dup (VAF 34.1%)                                                                                                                                                                  | IC                | NR                                     | /               | NR                    | No               | No (63)        |
| 17      | M      | 41        | 44.5                                    | 102              | 22                              | 87                            | M5       | NSD1          | 44-47,XY,+8,del(9q31)[cp10]                        | NRAS p.Q61R (VAF 26%), FLT3-TKD p.D839G (VAF 6.9%), WT1 p.S386* (VAF 3.4%), NRAS p.G12D (VAF 3%)                                                                                                     | IC                | PR                                     | LIT+FLT3i       | CR                    | Yes              | Yes (303)      |
| 18      | F      | 36        | 184.96                                  | 63               | 50                              | 55.5                          | M4       | NSD1          | 45-46,XX,del(9)(q13q33),22ps+[cp4]/46,XX,22ps+[12] | FLT3-ITD p.F612_G613insADNEYFYVDFREYEYDLKWEFPRENLEF (VAF 80%), WT1 p.A387Sfs*5 (VAF 51.8%), WT1 p.Q197* (VAF 5.5%), SETBP1 p.R1162Q (VAF 16.6%)                                                      | LIT+Ven           | NR                                     | /               | NR                    | No               | No (15)        |
| 19      | F      | 65        | 200                                     | 60               | 80                              | 90                            | M5       | NSD1          | 46,XX                                              | FLT3-ITD p.Y597_K614dup (VAF 29.6%), TET2 p.P1013Dfs*22 (VAF 46.2%)                                                                                                                                  | IC                | NR                                     | /               | NR                    | No               | No (11)        |
| 20      | M      | 15        | 63.92                                   | 70               | 71                              | 40                            | M5       | NSD1          | 46,XX                                              | FLT3-ITD p.P606_R607insGEYDLKWEFP (VAF 24.7%), MYC p.P74_P75insRNP (VAF 21.9%)                                                                                                                       | IC                | NR                                     | IC+FLT3i        | CR                    | Yes              | Yes (238)      |
| 21      | M      | 49        | 212                                     | 78               | 58                              | 72                            | M4       | NSD1          | 47,XY,+8[2]/46,XY[11]                              | FLT3-ITD p.R595_F605dup (VAF 39%)                                                                                                                                                                    | IC                | PR                                     | IC+FLT3i        | CR                    | No               | No (81)        |
| 22      | M      | 44        | 126                                     | 116              | 24                              | 71                            | M4       | NSD1          | 47,XY,+8[2]                                        | FLT3-ITD p.D593_F594insYVTGSSDNEYFYVD (VAF 7%), IDH1 p.R132H (VAF 13.6%)                                                                                                                             | IC                | NR                                     | /               | NR                    | No               | No (67)        |

| Case ID | Gender | Age year | White blood cells (×109/L) | Hemoglobin (g/L) | Platelets (×109/L) | Blast cell in bone marrow (%) | FAB type | NUP98 partner | Karyotype                                                                                                                    | Other co-mutations                                                                                                                                                                                                                                                                   | induction therapy | Disease status after induction therapy | Salvage Therapy | Optimal disease state | If received HSCT | Survival (day) |
|---------|--------|----------|----------------------------|------------------|--------------------|-------------------------------|----------|---------------|------------------------------------------------------------------------------------------------------------------------------|--------------------------------------------------------------------------------------------------------------------------------------------------------------------------------------------------------------------------------------------------------------------------------------|-------------------|----------------------------------------|-----------------|-----------------------|------------------|----------------|
| 23      | M      | 36       | 95.55                      | 120              | 167                | 69                            | M4       | NSD1          | 46,XY                                                                                                                        | FLT3-ITD p.L610_E611insQMVQVTGSSDNEYFYVDFREYEDLKWEPRENLE (VAF 37.9%), FLT3-ITD p.E611_F612insPPQVTGSSDNEYFYVDFREYEDLKWEPRENLE (VAF 22.9%)                                                                                                                                            | IC                | NR                                     | LIT+FLT3i       | PR                    | Yes              | Yes (989)      |
| 24      | M      | 4        | 18.99                      | 66               | 265                | 15.5                          | AML      | NSD1          | 46,XY                                                                                                                        | CEBPA p.E59* (VAF 44.6%), WT1 p.R467W (VAF 52.8%)                                                                                                                                                                                                                                    | IC                | NR                                     | IC              | CR                    | Yes              | Yes (653)      |
| 25      | M      | 8        | 234                        | 44               | 37                 | 79                            | M4       | NSD1          | 46,XY                                                                                                                        | FLT3-ITD p.K614_V615insSSDNEYFYVDFREYEDLKWEPRENLEFGK (VAF 39.1%)                                                                                                                                                                                                                     | IC                | NR                                     | /               | NR                    | No               | Yes (349)      |
| 26      | F      | 50       | 14.81                      | 67               | 26                 | 29                            | M2       | HOXA9         | 46,XX,t(7;11)(p15;p15)/47,XX,t(7;11)(p15;p15),+M/46,XX                                                                       | GATA2 p.N371_A372insPVCN (VAF 9.6%), TET2 p.R1516* (VAF 4%), MYC p.P74T (VAF 4%)                                                                                                                                                                                                     | IC                | NR                                     | /               | NR                    | No               | No (13)        |
| 27      | F      | 57       | 6.4                        | 90               | 48                 | 78                            | M2       | HOXA9         | 46,XX,t(7;11)(p15;p15)/47,XX,t(7;11)(p15;p15),+8/46,XX                                                                       | FLT3-TKD p.D835Y (VAF 23.1%), GATA2 p.A372T (VAF 28%), FAT1 p.E4573K (VAF 17.7%), FAT1 p.S4207I (VAF 32.4%), IL7R p.A254T (VAF 29.3%), WT1 c.1355-2A>C (VAF 16.6%), WT1 p.S386Lfs*71 (VAF 31.5%), ZBTB7A p.A287V (VAF 19.4%), RUNX1 p.D332N (VAF 29.1%), NOTCH1 p.G1034S (VAF 17.7%) | IC                | CR                                     | /               | CR                    | No               | No (423)       |
| 28      | M      | 24       | 43.13                      | 97               | 83                 | 46.5                          | M4       | HOXA9         | 46,XY,t(7;11)(p15;p15)/46,XY                                                                                                 | NRAS p.G13V (VAF 7.7%), IDH1 p.R132H (VAF 46.4%)                                                                                                                                                                                                                                     | IC                | CR                                     | /               | CR                    | Yes              | Yes (1096)     |
| 29      | F      | 37       | 1.5                        | 116              | 140                | 24                            | M2       | HOXA9         | 46,XX,t(7;11)(p15;p15)/46,XX                                                                                                 | TET2 p.Q1541* (VAF 23.2%), TET2 p.E1958Rfs*57 (VAF 15.2%), WT1 p.S386_E389delins* (VAF 21%)                                                                                                                                                                                          | LIT               | CR                                     | /               | CR                    | Yes              | Yes (1031)     |
| 30      | F      | 28       | 47.66                      | 28               | 20                 | 28                            | AML      | HOXA9         | 46,XY,t(7;11)(p15;p15)/46,XY                                                                                                 | TET2 p.Y819* (VAF 87.6%)                                                                                                                                                                                                                                                             | IC                | PR                                     | IC              | CR                    | Yes              | Yes (924)      |
| 31      | M      | 24       | 130.57                     | 55               | 31                 | 25.5                          | M2       | HOXA9         | 46,XY,t(7;11)(p15;p15)                                                                                                       | FLT3-ITD p.F621_G622insFREYEDLKWEPRENLEFGKNGMCMFLQHFFSIGKS LKCTYSPFVFAAGKVLGSGAF (VAF 21.4%)                                                                                                                                                                                         | IC                | CR                                     | /               | CR                    | Yes              | Yes (784)      |
| 32      | F      | 52       | 74.14                      | 87               | 31                 | 14.5                          | t-AML    | HOXA9         | 46,XX,t(7;11)(p15;p15)                                                                                                       | KRAS p.G12V (VAF 44.1%), BRCA1 p.P1099Lfs*10 (VAF 59.2%)                                                                                                                                                                                                                             | IC                | CR                                     | /               | CR                    | Yes              | Yes (725)      |
| 33      | F      | 38       | 47.96                      | 53               | 10                 | 81                            | AML      | HOXA9         | 46,XX,inv(3)(q21q26),t(7;11)(p15;p15),del(12p12),del(9p12)[cp11]                                                             | IDH2 p.R140W (VAF 49.2%)                                                                                                                                                                                                                                                             | LIT+Ven           | CR                                     | /               | CR                    | Yes              | Yes (261)      |
| 34      | M      | 34       | 15.88                      | 90               | 201                | 13.5                          | AML      | HOXA9         | NA                                                                                                                           | FLT3-ITD p.F612_G613insGFREYEDLKWEPRENLEF (VAF 5%)                                                                                                                                                                                                                                   | IC                | NR                                     | LIT+Ven+FLT3i   | CR                    | Yes              | Yes (774)      |
| 35      | F      | 66       | 2.55                       | 87               | 103                | 18.5                          | AML      | HOXA9         | 45-46,XX,t(7;11)p15;p15),21ps+[cp6]/46,XX,21ps+                                                                              | IDH1 p.R132H (VAF 34.8%)                                                                                                                                                                                                                                                             | LIT+Ven           | CR                                     | /               | CR                    | No               | Yes (65)       |
| 36      | M      | 30       | 151.55                     | 68               | 33                 | 13                            | AML      | PRRX2         | 46,XY,t(9;11)(q34;p15)/46,XY                                                                                                 | NRAS p.G12S (VAF 14.6%), NRAS p.G12D (VAF 8.9%), GATA2 p.A372T (VAF 41.3%), KRAS p.G12D (VAF 15.9%)                                                                                                                                                                                  | IC                | CR                                     | /               | CR                    | Yes              | Yes (1015)     |
| 37      | F      | 66       | 114.46                     | 50               | 10                 | 48.5                          | M4       | PRRX2         | 46,XX                                                                                                                        | RUNX1 p.A251Dfs*11 (VAF 43.2%), RUNX1 p.Q449Efs*152 (VAF 50.7%), TET2 p.Q769Rfs*62 (VAF 29.3%), NPM1 p.S260C (VAF 44%)                                                                                                                                                               | LIT+Ven           | CR                                     | /               | CR                    | No               | No (227)       |
| 38      | F      | 59       | 18.43                      | 84               | 21                 | 32                            | AML      | PRRX2         | 41-46,XX,inv(5)(q14q32)[cp6]/3 q34;p15][cp10]/44-46,XX,inv(5)(q14q32),der(7p12),-11,der(12)t(11;12)(q13;p13),-19,+M1-M2[cp3] | GATA2 p.A372T (VAF 32%), WT1 p.R385Tfs*5 (VAF 47.6%), RUNX1 p.S141_A142insG (VAF 49.1%), NRAS p.G12D (VAF 45.4%)                                                                                                                                                                     | LIT               | NR                                     | /               | NR                    | No               | No (19)        |
| 39      | F      | 58       | 18.38                      | 93               | 49                 | 15.5                          | s-AML    | PRRX2         | 45,XX,-7/45,XX,-7,t(9;11)(q34;p15)                                                                                           | WT1 p.A387Cfs*6 (VAF 34.5%), ETV6 p.Y346Lfs*6 (VAF 38.1%), PTPN11 p.F71L (VAF 10%), PTPN11 p.S506P (VAF 19.8%)                                                                                                                                                                       | LIT               | CR                                     | /               | CR                    | Yes              | No (283)       |
| 40      | F      | 64       | 70.52                      | 65               | 83                 | 33                            | M4       | HMGB3         | 46,XX                                                                                                                        | FLT3-ITD p.F612_G613insVKWEPRENLEF (VAF 4.3%), NRAS p.G12D (VAF 10.5%), NRAS p.G13D (VAF 5.4%), MYC p.TP73GL (VAF 13%), KRAS p.G13D (VAF 6.4%), IDH2 p.R140Q (VAF 5%)                                                                                                                | IC                | NR                                     | /               | NR                    | No               | No (258)       |
| 41      | F      | 45       | 92.45                      | 73               | 56                 | 88                            | AML      | HMGB3         | 46,XX                                                                                                                        | FLT3-ITD p.Y599_D600insANVDFREYEDLKWEPRENLEF (VAF 50.8%), WT1 p.Q257* (VAF 47.1%), WT1 p.S386Vfs*9 (VAF 14.4%)                                                                                                                                                                       | IC+FLT3i          | CR                                     | /               | CR                    | Yes              | Yes (518)      |
| 42      | F      | 50       | 2.6                        | 69               | 34                 | 32                            | AML      | TOP1          | 45-46,XX,t(11;20)(p15;q11)[cp10]                                                                                             | NRAS p.Q61R (VAF 47.6%), STAG2 p.M1212* (VAF 47.6%)                                                                                                                                                                                                                                  | LIT+Ven           | CR                                     | /               | CR                    | No               | Yes (375)      |

| Case ID | Gender | Age, year | White blood cells (×109/L) | Hemoglobin (g/L) | Platelets (×109/L) | Blast cell in bone marrow (%) | FAB type | NUP98 partner | Karyotype                                               | Other co-mutations                                                                                                                                                    | induction therapy | Disease status after induction therapy | Salvage Therapy | Optimal disease state | If received HSCT | Survival (day) |
|---------|--------|-----------|----------------------------|------------------|--------------------|-------------------------------|----------|---------------|---------------------------------------------------------|-----------------------------------------------------------------------------------------------------------------------------------------------------------------------|-------------------|----------------------------------------|-----------------|-----------------------|------------------|----------------|
| 43      | F      | 58        | 1.6                        | 102              | 125                | 35.5                          | t-AML    | TOP1          | 44-46,XX,del(7)(q31),t(11;20)(p15;q11)[cp8]/46,XX       | FLT3-TKD p.D835V (VAF 6.4%), CEBPA p.S299Efs*22 (VAF 5%), NRAS p.G12D (VAF 5.1%)                                                                                      | IC                | CR                                     | /               | CR                    | No               | Yes (355)      |
| 44      | M      | 48        | 5                          | 91               | 42                 | 21                            | s-AML    | KDM5A         | 46,XY                                                   | FLT3-ITD p.T582_E604dup (VAF 12.6%), CEBPA p.A72Rfs*89 (VAF 8.6%), PTPN11 p.D61H (VAF 16%), ASXL2 p.E416* (VAF 11.2%), WT1 p.H416Y (VAF 15.5%), IDH1 p.R132H (VAF 5%) | IC                | CR                                     | /               | CR                    | Yes              | Yes (364)      |
| 45      | F      | 26        | 79.13                      | 96               | 84                 | 74                            | M5       | KDM5A         | 46,XX                                                   | RAD21 p.G547Afs*65 (VAF 21.6%), FLT3 p.V491L (VAF 10.5%), FLT3 p.K663R (VAF 9.3%)                                                                                     | IC                | CR                                     | /               | CR                    | Yes              | Yes (284)      |
| 46      | M      | 28        | 6.29                       | 55               | 250                | 57                            | ETP-ALL  | CCDC28A       | 47-48,XY,+4,del(6q22)[cp5]/46,XY                        | NRAS p.G12D (VAF 49.6%), KIT p.D496Y (VAF 33%), WT1 p.R218Tfs*35 (VAF 38.2%), ETV6 p.W380L (VAF 46.7%), SUZ12 c.1024-1G>T (VAF 44.9%), PHF6 p.R274* (VAF 44.2%)       | VDPCP             | CR                                     | /               | CR                    | No               | No (72)        |
| 47      | M      | 21        | 3.97                       | 136              | 127                | 32                            | ETP-ALL  | CCDC28A       | 47,XY,del(6q21),+8/46,XY                                | CEBPA p.H24Afs*84 (VAF 24.5%), PHF6 p.E177Qfs*42 (VAF 24%), RUNX1 p.D332N (VAF 25.3%)                                                                                 | IA                | CR                                     | /               | CR                    | Yes              | Yes (289)      |
| 48      | M      | 54        | 7.23                       | 89               | 92                 | 79.5                          | M4       | TNRC18        | 47,XY,+8/46,XY                                          | NRAS p.Q61H (VAF 21.7%), IDH1 p.R132C (VAF 42.4%), SMC1A p.R586Q (VAF 41.4%)                                                                                          | IC                | NA                                     | /               | NA                    | No               | NA             |
| 49      | F      | 32        | 89.79                      | 74               | 15                 | 52                            | M4       | HOXA11        | NA                                                      | PTPN11 p.L261F (VAF 40.3%)                                                                                                                                            | IC                | NR                                     | /               | NR                    | No               | No (23)        |
| 50      | M      | 32        | 83.79                      | 29               | 5                  | 27                            | M2       | HHEX          | 44-46,XY,del(7)(q31),t(10;11)(q23;p15),-18,+M1-M2[cp11] | FLT3-ITD p.V581_E611dup (VAF 15.6%), FLT3-ITD p.P606_R607insSPVDFREYEDLKWEFP (VAF 12.9%), FLT3-ITD p.D593_R607dup (VAF 10%)                                           | IC                | NA                                     | /               | NA                    | No               | Yes (464)      |
| 51      | M      | 70        | 14.88                      | 123              | 136                | 21                            | s-AML    | DDX10         | 43-46,XY,inv(11)(p15q22)[CP8]/46,XY                     | CEBPA p.M1? (VAF 11.9%), CEBPA p.E8* (VAF 18.7%), CEBPA p.H24Afs*84 (VAF 11.7%), CEBPA p.I55Afs*54 (VAF 8.9%), CEBPA p.Q207* (VAF 11%)                                | IC                | CR                                     | /               | CR                    | No               | NA             |
| 52      | F      | 74        | 2.79                       | 43               | 105                | 65                            | M4       | PSIP1         | 46,XX                                                   | No other mutation                                                                                                                                                     | LIT               | NR                                     | /               | NR                    | No               | No (16)        |
| 53      | M      | 34        | 4.18                       | 85               | 213                | 16                            | M2       | KMT2A         | 42-46,XY,del(11q23)[cp13]                               | DNMT3A p.R882H (VAF 42.9%), IDH2 p.R140Q (VAF 2.6%)                                                                                                                   | IC+Ven            | CR                                     | /               | CR                    | Yes              | Yes (221)      |
| 54      | M      | 36        | 3.64                       | 64               | 105                | 93                            | B-ALL    | ASNSP4        | 46,XY                                                   | IDH1 p.R132C (VAF 48.7%)                                                                                                                                              | VDPCP             | NR                                     | /               | NR                    | No               | No (95)        |
| 55      | M      | 13        | 244.67                     | 86               | 267                | 94                            | ETP-ALL  | LNP1          | 45-47,XY,t(3;11)(q12;p15),+8[cp13]/46,XY                | FLT3-TKD p.D835H (VAF 6.3%), FLT3 p.Y572C (VAF 41.9%), ETV6 p.I140Gfs*71 (VAF 50%), CBL p.Y774* (VAF 11.7%)                                                           | CDVD+Asp+CAG      | NR                                     | /               | NR                    | No               | No (80)        |

Abbreviations: F, female; M, male, FAB, French-American-British; AML, acute myeloid leukemia; t-AML, therapy-related AML; s-AML, secondary AML; ALL, acute lymphoblastic leukemia; ETP-ALL, Early T-cell precursor acute lymphoblastic leukemia; B-ALL, B-cell acute lymphoblastic leukemia; Ven, venetoclax; FLT3i, FLT3 inhibitor; VDPCP; vincristine, daunorubicin, asparaginase (ASP), cyclophosphamide and prednisone; CDVD, cyclophosphamide, daunorubicin, vincristine and dexamethasone; HSCT, hematopoietic stem cell transplantation. CR, complete remission; PR, partial remission; NR, no remission; NA, not available. IC, Intensive Chemotherapy, including idarubicin+Ara-C±Etoposide, homoharringtonine+Ara-C±etoposide, daunorubicin+Ara-C±etoposide, Mitoxantrone+Ara-C, cladribine and homoharringtonine+low dose Ara-C+aclacinomycin+G-CSF; LIT, Low Intensive Therapy, including azacitidine, decitabine, hydroxyurea, low dose Ara-C+idarubicin+G-CSF.
