# Supplementary material for: The landscape of NUP98 rearrangements clinical characteristics and treatment response from 1491 acute leukemia patients
Source: PubMed Central journal article supplement (PMC11094082; doi:10.1038/s41408-024-01066-y), 2024-05-14
Supplement: 41408_2024_1066_MOESM2_ESM.pdf [file 41408_2024_1066_MOESM2_ESM.pdf]

**Table S2. Univariate analysis of clinicopathologic and molecular genetic features to predict overall survival.**

| Variables                             | No. of patients, n(%) | <i>p</i> value |
|---------------------------------------|-----------------------|----------------|
| Age                                   |                       | 0.103          |
| ≥60 years                             | 10 (18.2)             |                |
| <60 years                             | 45 (81.8)             |                |
| Gender                                |                       | 0.088          |
| Male                                  | 27 (49.1)             |                |
| Female                                | 28 (50.9)             |                |
| White blood cells                     |                       | 0.570          |
| Leukocytosis                          | 40 (72.7)             |                |
| Leukepenia                            | 9 (16.4)              |                |
| Normal                                | 6 (10.9)              |                |
| Hemoglobin                            |                       | 1.000          |
| Anemia                                | 50 (90.9)             |                |
| Normal                                | 5 (9.1)               |                |
| Platelets                             |                       | 0.820          |
| Thrombocytopenia                      | 41 (74.5)             |                |
| Normal                                | 14 (25.5)             |                |
| AL type                               |                       |                |
| AML                                   | 51 (92.7)             |                |
| ETP-ALL                               | 3 (5.5)               |                |
| B-ALL                                 | 1 (1.8)               |                |
| Karyotype                             |                       | 0.861          |
| Complex (≥3 aberrations)              | 3 (5.7)               |                |
| Simple (1~2 aberrations)              | 26 (49.1)             |                |
| Normal                                | 24 (45.3)             |                |
| Gene mutations*                       |                       |                |
| FLT3                                  | 32 (58.2)             | 0.917          |
| FLT3-ITD                              | 27 (49.1)             | 0.856          |
| WT1                                   | 17 (30.9)             | 0.794          |
| NUP98 partner                         |                       | 0.263          |
| NSD1                                  | 25 (45.5)             |                |
| HOXA9                                 | 10 (18.2)             |                |
| Other                                 | 20 (36.4)             |                |
| FLT3 inhibitor**                      |                       | 0.072          |
| Yes                                   | 17 (33.3)             |                |
| No                                    | 34 (66.7)             |                |
| Ven**                                 |                       | 0.192          |
| Yes                                   | 19 (37.3)             |                |
| No                                    | 32 (62.7)             |                |
| FLT3i or/and Ven therapy**            |                       | 0.041          |
| Yes                                   | 26 (51)               |                |
| No                                    | 25 (49)               |                |
| Status of initial induction therapy** |                       | 0.917          |
| CR                                    | 19 (37.3)             |                |
| PR/NR                                 | 30 (58.8)             |                |
| NA                                    | 2 (3.9)               |                |
| HSCT**                                |                       | <0.001         |
| Yes                                   | 26 (51)               |                |
| No                                    | 25 (49)               |                |

Abbreviations: AL, acute leukemia; AML, acute myeloid leukemia; ETP-ALL, Early T-cell precursor acute lymphoblastic leukemia; B-ALL, B-cell acute lymphoblastic leukemia; FLT3, Fms-like tyrosine kinase 3; FLT3-ITD, internal tandem duplications of the FLT3 gene; WT1, Wilms tumor 1; FLT3i, FLT3 inhibitor; VEN, venetoclax; CR, complete remission; PR, partial remission; NR, no remission; NA, not available; HSCT, hematopoietic stem cell transplantation. \*, Only listed high frequency mutations. \*\*, Only analyzed in 51 AML patients.
