# Supplementary material for: The landscape of NUP98 rearrangements clinical characteristics and treatment response from 1491 acute leukemia patients
Source: PubMed Central journal article supplement (PMC11094082; doi:10.1038/s41408-024-01066-y), 2024-05-14
Supplement: 41408_2024_1066_MOESM3_ESM.pdf [file 41408_2024_1066_MOESM3_ESM.pdf]

**Table S3. Multivariate analysis of 51 AML patients.**

| Parameters                             | Hazard ratio | 95% confidence interval |             | <i>p</i> value |
|----------------------------------------|--------------|-------------------------|-------------|----------------|
|                                        |              | Lower limit             | Upper limit |                |
| Gender                                 | 0.543        | 0.065                   | 4.511       | 0.572          |
| Age(y)                                 | 1.100        | 1.032                   | 1.171       | 0.003          |
| White blood cell (×10 <sup>9</sup> /L) | 1.031        | 1.008                   | 1.054       | 0.007          |
| Hemoglobin (g/L)                       | 1.031        | 0.993                   | 1.072       | 0.114          |
| Platelet (×10 <sup>9</sup> /L)         | 1.009        | 0.984                   | 1.035       | 0.488          |
| Bone marrow blast cell (%)             | 1.017        | 0.981                   | 1.055       | 0.355          |
| <i>WT1</i> mutation                    | 4.207        | 0.613                   | 28.877      | 0.144          |
| <i>FLT3</i> mutation                   | 0.006        | <0.001                  | 0.145       | 0.002          |
| <i>NUP98::NSD1</i> fusion gene         | 3.814        | 0.333                   | 43.737      | 0.282          |
| FLT3i or/and VEN therapy               | 0.013        | 0.001                   | 0.199       | 0.002          |
| HSCT                                   | 0.003        | <0.001                  | 0.099       | 0.001          |

Overall survival: time from confirmed diagnosis to last follow-up or death. Abbreviations: *WT1*, *Wilms tumor 1*; *FLT3*, *Fms-like tyrosine kinase 3*; HSCT, hematopoietic stem cell transplantation.
